# Supplementary material for: Characterizing microglia activation: a spatial statistics approach to maximize information extraction
Source: PubMed Central journal article supplement (PMC5431479; doi:10.1038/s41598-017-01747-8), 2017-05-08
Supplement: 41598_2017_1747_MOESM1_ESM.pdf [file 41598_2017_1747_MOESM1_ESM.pdf]

## Characterizing microglia activation: a spatial statistics approach to maximize information extraction.

Benjamin M. Davis, Manuel Salinas-Navarro, M. Francesca Cordeiro, Lieve Moons, Lies De Groef

Supplementary Table 1. Overview of all Dixon's  $\chi^2$ -test results across retinas from naive eyes, with  $N_i$  'low activity' microglia and  $N_j$  'high activity' microglia.

|     | $N_i$ | $N_j$ | C        | df | p-value | $z_{ii}$        | df | p-value | $z_{jj}$        | df | p-value |
|-----|-------|-------|----------|----|---------|-----------------|----|---------|-----------------|----|---------|
| #1  | 1965  | 1386  | 1.09     | 2  | 0.5788  | 0.90            | 1  | 0.3667  | 0.89            | 1  | 0.3731  |
| #2  | 1846  | 999   | 5.13     | 2  | 0.0769  | -0.92           | 1  | 0.3600  | -2.26           | 1  | 0.0236  |
| #3  | 1437  | 666   | 1.69     | 2  | 0.4295  | -0.10           | 1  | 0.9207  | -1.22           | 1  | 0.2230  |
| #4  | 1961  | 1065  | 5.11     | 2  | 0.0776  | -2.00           | 1  | 0.0470  | -1.85           | 1  | 0.0646  |
| #5  | 2077  | 908   | 3.84     | 2  | 0.1463  | -1.96           | 1  | 0.0500  | -0.87           | 1  | 0.3818  |
| #6  | 1811  | 1409  | 11.4     | 2  | 0.0033  | 0.08            | 1  | 0.9381  | -3.01           | 1  | 0.0027  |
| #7  | 1871  | 1010  | 4.67     | 2  | 0.0970  | -2.15           | 1  | 0.0319  | -1.16           | 1  | 0.2481  |
| #8  | 1795  | 998   | 0.80     | 2  | 0.6709  | 0.43            | 1  | 0.6652  | -0.49           | 1  | 0.6232  |
| #9  | 1851  | 990   | 2.40     | 2  | 0.3005  | 1.49            | 1  | 0.1363  | 1.02            | 1  | 0.3093  |
| #10 | 1679  | 700   | 3.68     | 2  | 0.1588  | 1.91            | 1  | 0.0560  | 0.34            | 1  | 0.4158  |
| #11 | 1587  | 720   | 2.77     | 2  | 0.2506  | -1.37           | 1  | 0.1692  | -1.44           | 1  | 0.1509  |
| #12 | 1926  | 744   | 3.24     | 2  | 0.1982  | -1.03           | 1  | 0.3043  | 0.91            | 1  | 0.3647  |
| #13 | 1745  | 967   | 0.40     | 2  | 0.8175  | -0.53           | 1  | 0.5949  | 0.09            | 1  | 0.9321  |
| #14 | 1657  | 1151  | 1.59     | 2  | 0.4525  | -1.26           | 1  | 0.2084  | -0.52           | 1  | 0.6037  |
|     | $N_i$ | $N_j$ | $\sum C$ | df | p-value | $\sum z_{ii}^2$ | df | p-value | $\sum z_{jj}^2$ | df | p-value |
| ALL | 25208 | 13713 | 47.81    | 28 | 0.0112  | 25.00           | 14 | 0.0346  | 26.55           | 14 | 0.0220  |

Supplementary Table 2. Overview of all Dixon's  $\chi^2$ -test results across retinas from ONC eyes, with  $N_i$  'low activity' microglia and  $N_j$  'high activity' microglia.

|     | $N_i$ | $N_j$ | C        | df | p-value | $z_{ii}$        | df | p-value | $z_{jj}$        | df | p-value |
|-----|-------|-------|----------|----|---------|-----------------|----|---------|-----------------|----|---------|
| #1  | 1426  | 1908  | 13.84    | 2  | 0.0010  | 0.45            | 1  | 0.6503  | -3.20           | 1  | 0.0014  |
| #2  | 1968  | 2363  | 23.22    | 2  | 0.0001  | -1.88           | 1  | 0.0604  | -4.82           | 1  | 0.0001  |
| #3  | 2190  | 1879  | 12.56    | 2  | 0.0019  | 2.19            | 1  | 0.0284  | -1.60           | 1  | 0.1092  |
| #4  | 1293  | 2074  | 20.78    | 2  | 0.0001  | -3.09           | 1  | 0.0020  | -4.35           | 1  | 0.0001  |
| #5  | 1950  | 1869  | 0.70     | 2  | 0.7049  | -0.66           | 1  | 0.5092  | -0.75           | 1  | 0.4506  |
| #6  | 2052  | 1615  | 5.59     | 2  | 0.0610  | 0.69            | 1  | 0.4931  | -1.75           | 1  | 0.0808  |
| #7  | 2018  | 2243  | 8.15     | 2  | 0.0170  | 1.60            | 1  | 0.1101  | -1.35           | 1  | 0.1772  |
| #8  | 1824  | 1936  | 1.00     | 2  | 0.6051  | 0.02            | 1  | 0.9855  | -0.89           | 1  | 0.3752  |
| #9  | 1844  | 2053  | 24.68    | 2  | 0.0001  | -0.10           | 1  | 0.9203  | -4.52           | 1  | 0.0001  |
| #10 | 1446  | 2016  | 0.52     | 2  | 0.7703  | -0.62           | 1  | 0.5369  | -0.61           | 1  | 0.5441  |
| #11 | 1414  | 1890  | 22.17    | 2  | 0.0001  | 0.64            | 1  | 0.5202  | -3.89           | 1  | 0.0001  |
| #12 | 1555  | 1966  | 6.62     | 2  | 0.0365  | 0.02            | 1  | 0.9812  | -2.31           | 1  | 0.0211  |
| #13 | 1434  | 1167  | 1.56     | 2  | 0.4582  | 0.85            | 1  | 0.3930  | -0.45           | 1  | 0.6494  |
| #14 | 1828  | 652   | 2.18     | 2  | 0.3357  | -0.80           | 1  | 0.4220  | -1.46           | 1  | 0.0891  |
|     | $N_i$ | $N_j$ | $\sum C$ | df | p-value | $\sum z_{ii}^2$ | df | p-value | $\sum z_{jj}^2$ | df | p-value |
| ALL | 24242 | 25631 | 143.57   | 28 | 0.00001 | 23.72           | 14 | 0.0495  | 104.80          | 14 | 0.00001 |

Supplementary Table 3. Overview of all Dixon's  $\chi^2$ -test results across retinas from contralateral eyes, with  $N_i$  'low activity' microglia and  $N_j$  'high activity' microglia.

|     | $N_i$ | $N_j$ | C        | df | p-value | $z_{ii}$        | df | p-value | $z_{jj}$        | df | p-value |
|-----|-------|-------|----------|----|---------|-----------------|----|---------|-----------------|----|---------|
| #1  | 1301  | 625   | 3.88     | 2  | 0.1434  | -1.85           | 1  | 0.0643  | -0.12           | 1  | 0.9045  |
| #2  | 1640  | 707   | 0.01     | 2  | 0.9931  | -0.10           | 1  | 0.9214  | 0.02            | 1  | 0.9866  |
| #3  | 2050  | 1015  | 1.48     | 2  | 0.4781  | -0.43           | 1  | 0.6679  | 0.82            | 1  | 0.4110  |
| #4  | 1482  | 887   | 1.16     | 2  | 0.5593  | -1.01           | 1  | 0.3147  | -0.05           | 1  | 0.9567  |
| #5  | 2074  | 796   | 11.49    | 2  | 0.0032  | -2.10           | 1  | 0.0355  | 1.52            | 1  | 0.1277  |
| #6  | 2202  | 1084  | 2.07     | 2  | 0.3549  | -1.01           | 1  | 0.3140  | 0.43            | 1  | 0.6657  |
| #7  | 2275  | 1116  | 6.05     | 2  | 0.0486  | -2.45           | 1  | 0.0143  | -1.34           | 1  | 0.1806  |
| #8  | 2175  | 861   | 12.01    | 2  | 0.0025  | 0.00            | 1  | 0.9989  | -3.12           | 1  | 0.0018  |
| #9  | 1984  | 961   | 0.65     | 2  | 0.7213  | 0.78            | 1  | 0.4374  | 0.16            | 1  | 0.8714  |
| #10 | 1769  | 655   | 0.11     | 2  | 0.9442  | 0.01            | 1  | 0.9908  | 0.32            | 1  | 0.7508  |
| #11 | 2072  | 764   | 0.66     | 2  | 0.7181  | 0.81            | 1  | 0.4165  | 0.31            | 1  | 0.7598  |
| #12 | 1836  | 608   | 1.28     | 2  | 0.5267  | -1.04           | 1  | 0.2974  | -0.01           | 1  | 0.9958  |
| #13 | 1520  | 615   | 8.48     | 2  | 0.0144  | -2.52           | 1  | 0.0118  | 0.39            | 1  | 0.6966  |
| #14 | 1301  | 625   | 3.88     | 2  | 0.1434  | -1.85           | 1  | 0.0643  | -0.12           | 1  | 0.9045  |
|     | $N_i$ | $N_j$ | $\sum C$ | df | p-value | $\sum z_{ii}^2$ | df | p-value | $\sum z_{jj}^2$ | df | p-value |
| ALL | 24380 | 10694 | 49.33    | 26 | 0.0038  | 24.77           | 13 | 0.0248  | 15.09           | 13 | 0.3017  |

Supplementary file: step-by-step protocol for automatic quantification of Iba-1 labelled microglia in retinal whole-mounts

The source code of the microglia analysis script is publically available via  
<http://bio.kuleuven.be/df/lm/research/methods>

### **(Step 1) Identification of Iba-1 labelled microglia**

- *Rationale:* Identification of Iba-1 labelled microglia in retinal whole-mounts was achieved using a five-step algorithm.
- *Protocol details:*
  1. Images (z-stacks, .lsm format) were acquired using 15% overlap in X and Y dimensions to permit automated stitching of the resulting images to a mosaic, using FluoViewer (v. 4.0) software (Olympus).
  2. .lsm files were imported into the Fiji programme, followed by conversion to 8-bit maximum projection images of the retinal whole-mount. This was done to reduce the size of the image file and reduce the dataset to two dimensions.
  3. Segmentation of bright Iba-1 labelled microglia was achieved using a grey scale attribute opening filter (area minimum: 25 pixels; connectivity: 8) from the MorphoLibJ package. These settings effectively isolated Iba-1 microglia from the dark background.
  4. Isolation of microglia soma (large round objects) from processes (long, thin objects) was achieved using an opening morphological filter (1-pixel radius octagon) from the MorphoLibJ software package. This approach effectively removed the majority of microglia processes from the image, but did sometimes struggle with large processes and at sites where processes intersected. A *post hoc* particle cut-off was used to overcome this problem (*cf.* step 3 below).
  5. Finally, microglia soma were segmented from image background using a maximum entropy threshold. This technique is preferable to Otsu and Li thresholding, which are more conservative in soma identification and led to undercounting.

## **(Step 2) Quantification of microglia somata**

- *Rationale:* Once microglia soma had been successfully segmented from the image, the Fiji (ImageJ) Analyse Particles function was used to identify microglia soma from remaining small pixel noise and extract information regarding microglial soma area, centre of mass and roundness.
- *Protocol details:*

1. A minimum particle size of 10 pixels (particle size threshold) was defined to exclude small pixel noise. This approach was found to be preferable over other noise reduction approaches (e.g., median/mean filtering) as the latter had a tendency to introduce additional particle artefacts into the image.
2. Calculation of soma area and centre of mass.
3. Calculation of soma roundness:  $Roundness = \frac{4A}{\pi M^2}$

*where A is the area of the microglia soma and M is the length of the major axis, derived from the longest axis of an ellipse fit to each microglia soma.*

4. Calculation of the Euclidean distance of each microglia centroid, relative to the centre of the optic nerve head (ONH):  $d = \sqrt{(x-a)^2 + (y-b)^2}$

*where d is the microglia Euclidian distance, (a,b) is the coordinate centre of the ONH (determined manually) and (x,y) is the centroid of each microglia within a retina.*

5. A data set comprising (x,y) microglia coordinates and the position (a,b) of the ONH for each whole-mounted retina was extracted from the Fiji script, and was used in conjunction with R spatstat software for subsequent analysis to allow averaging of multiple retinas and comparisons of microglia distribution between treatment groups.

## **(Step 3) Evaluation of microglia distribution**

- *Rationale:* Microglia population distribution was characterized by nearest neighbour distance (NND) and regularity index, using a Fiji plugin 'NND' developed by Y. Mao [1].

- *Protocol details:*

1. In order to exclude small particle artefacts that were being erroneously defined as microglia – these artefacts were determined to be large microglia processes that the script was incorrectly counting as soma –, only particles with a NND > 14 pixels were considered to be microglia.
2. Calculation of regularity index:  $RI = \frac{X_{NND}}{\delta_{NND}}$

where  $X_{NND}$  is the average NND of a population and  $\delta_{NND}$  is the standard deviation of the NND of that population.

**(Step 4) Determination of the whole-mount retinal area**

- *Rationale:* The boundaries of each retinal whole-mount were outlined and its area was measured, in order to calculate microglia densities and generate (x,y) coordinates for subsequent spatial statistics analysis.

- *Protocol details:*

1. A low-intensity threshold (0-5) was applied to each 8-bit image.
2. The pixel area of this selection was measured using Fiji and converted to mm<sup>2</sup>. The global microglia density was determined by dividing the total microglia population by the total retinal area.
3. The boundary of each retinal area was also exported as a list of (x,y) coordinates and used in conjunction with microglia centroid coordinates to generate spatial point processes with retinal area boundaries for subsequent Ripley's *K* analysis in the R spatstat software package.

**Reference**

1. Mao, Y. *Nearest Neighbor Distances Calculation with ImageJ*. 2016 [12/12/2016]; Available from: [https://icme.hpc.msstate.edu/mediawiki/index.php/Nearest\\_Neighbor\\_Distances\\_Calculation\\_with\\_ImageJ](https://icme.hpc.msstate.edu/mediawiki/index.php/Nearest_Neighbor_Distances_Calculation_with_ImageJ).
